# Supplementary material for: Determination of the internal quantum efficiency for photoelectrochemical reaction in a semiconductor photoelectrode by photoacoustic detection
Source: Royal Society of Chemistry journal article supplement (doi:10.1039/d0cc01911a), 2020-01-01
Supplement: d0cc01911a1.pdf [file d0cc01911a1.pdf]

**Determination of the internal quantum efficiency for photoelectrochemical reaction in a semiconductor photoelectrode by photoacoustic detection**

Naoya Murakami<sup>a,b,\*</sup>, Keita Okuzono<sup>b</sup>

<sup>a</sup> Department of Applied Chemistry, Faculty of Engineering, Kyushu Institute of Technology, 1-1 Sensuicho, Tobata, Kitakyushu 804-8550, Japan

<sup>b</sup> Graduate School of Life Science and Systems Engineering, Kyushu Institute of Technology, 2-4 Hibikino, Wakamatsu-ku, Kitakyushu 808-0196, Japan

\* Corresponding author. TEL: +81-93-695-6038, E-mail address: murakami@life.kyutech.ac.jp

### **Preparation of samples**

Typically, commercial MOD solutions for bismuth oxide (Kojundo Chemical Laboratory, SYM-BIO5) and vanadium oxide (Kojundo Chemical Laboratory, V-02 DIP) were mixed at a ratio of Bi : V = 1 : 1, and butyl acetate (Wako Chemicals) and ethyl cellulose (Tokyo Chemical Industry) were added. The solution was coated on FTO glass (Geomatec, 10 ohm/sq, 0.5 mm) with a spin-coater (Mikasa, MS-B100, 1000 rpm, 15 s), and it was heat-treated using an electric furnace at 500°C for 30 min. The samples prepared without and with ethyl cellulose are denoted as wo-EC and w-EC, respectively.

### **Transmittance/reflectance measurement**

In order to estimate LHE of the prepared transparent sample, normal incidence transmittance and 10-deg-incidence reflectance of the prepared film were measured using a homemade spectroscopic system including a laser diode module (Edmund Optics, 85-227, 405 nm, 10.2 mW) and optical power meter (Hioki, 3664) equipped with a photo-sensor (Hioki, 9742-10). A schematic image of the spectroscopic system is shown in Fig. S1. Fig. S2 shows UV-VIS spectra of FTO glass and wo-EC sample, which were measured using commercial UV-vis spectrometer (Shimadzu, UV-1800).

### **PA measurement**

The PA signal was acquired by a digital MEMS microphone (Knowles, SPK0641HT4H-1) buried in the cell and recorded using a PC equipped with a digital I/O interface. Time-series data were acquired by analogue conversion of the PA signal followed by Fourier transform with a Hamming window function.

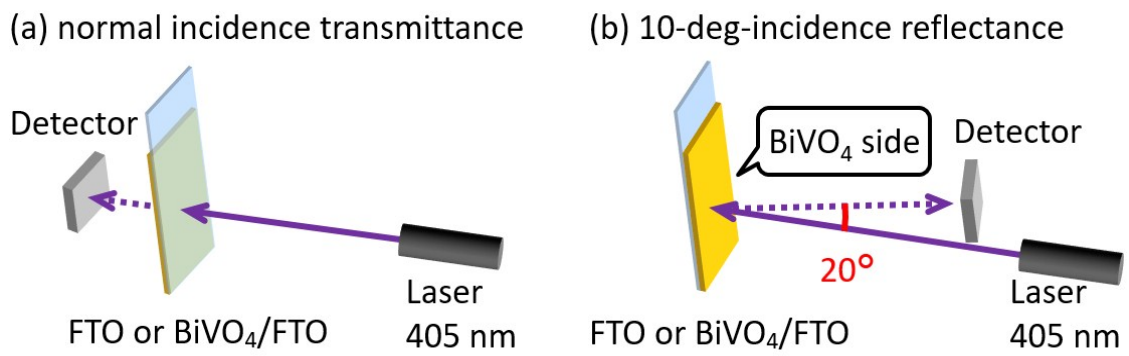

**Fig. S1** Spectroscopic system for T/R measurement.

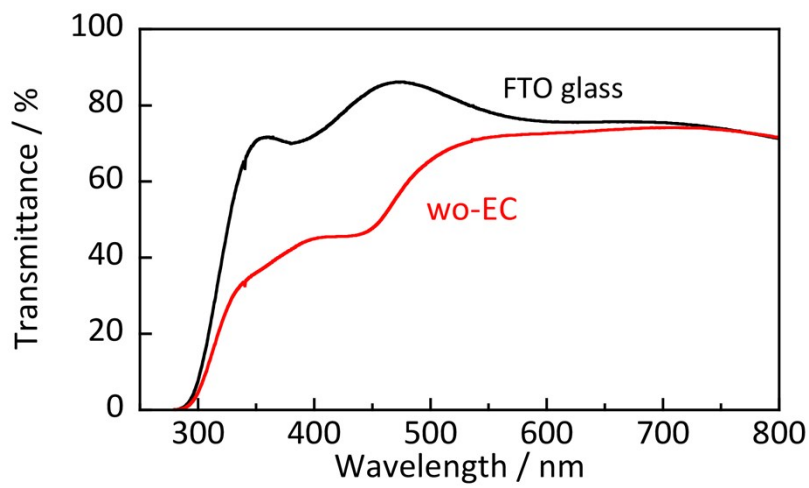

**Fig. S2** UV-VIS spectra of FTO glass and wo-EC sample

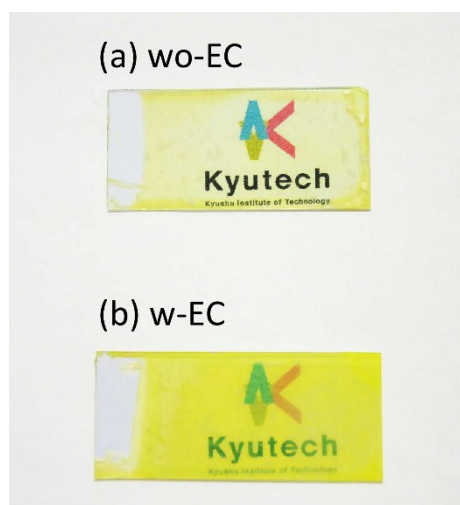

**Fig. S3** Photograph of BiVO<sub>4</sub>/FTO samples (wo-EC and w-EC).

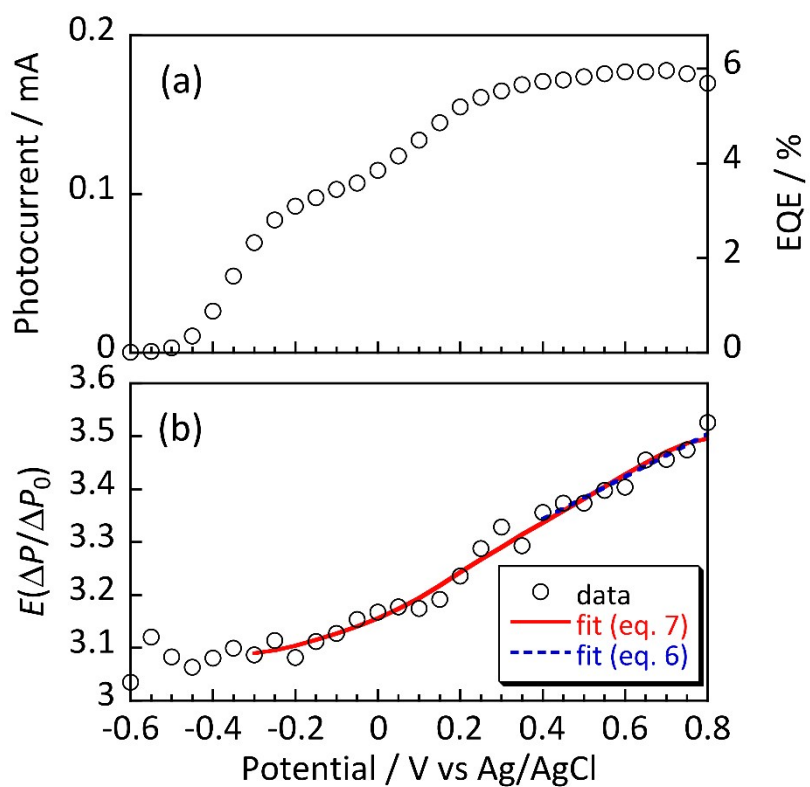

**Fig. S4** (a) Photocurrent and (b)  $E(\Delta P/\Delta P_0)$  of a  $\text{BiVO}_4/\text{FTO}$  electrode (wo-EC sample,  $\text{BiVO}_4$ -side irradiation) in aqueous  $\text{Na}_2\text{SO}_3+\text{Na}_2\text{SO}_4$  electrolyte as a function of applied potential.
